# Supplementary material for: Preparation and Characterization of Nano-Fe3O4 and Its Application for C18-Functionalized Magnetic Nanomaterials Used as Chromatographic Packing Materials
Source: MDPI journal article supplement (doi:10.3390/nano13061111), 2023-03-20

# Preparation and Characterization of Nano-Fe<sub>3</sub>O<sub>4</sub> and Its Application for C18-Functionalized Magnetic Nanomaterials Used as Chromatographic Packing Materials

Wen-Xin Liu <sup>1,2</sup>, Wei-Na Zhou <sup>2</sup>, Shuang Song <sup>1</sup>, Yong-Gang Zhao <sup>2,\*</sup> and Yin Lu <sup>2,\*</sup>

<sup>1</sup> College of Environment, Zhejiang University of Technology, Hangzhou 310014, China; lwx187221@163.com (W.-X.L.); ss@zjut.edu.cn (S.S.)

<sup>2</sup> College of Biological and Environmental Engineering, Zhejiang Shuren University, Hangzhou 310015, China; 18030219706@163.com

\* Correspondence: zhyg91213@163.com (Y.-G.Z.); luyin@zjsru.edu.cn (Y.L.)

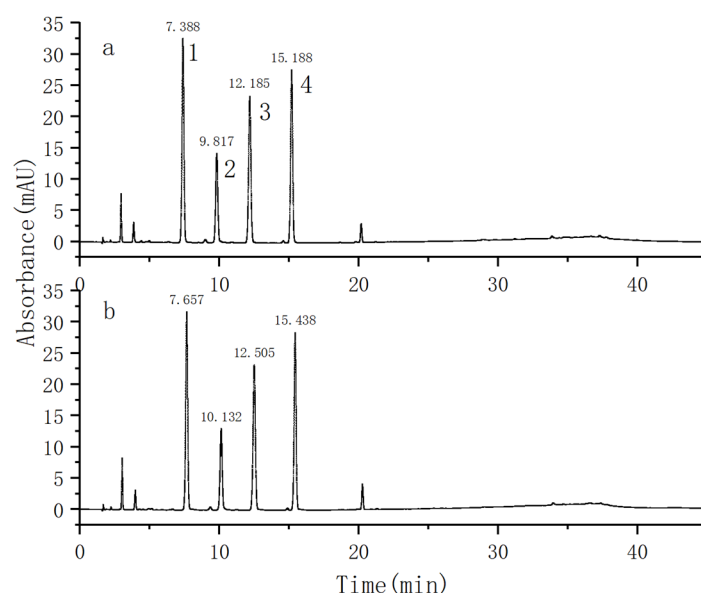

**Figure S1.** Chromatograms of the four sulfonamides: (1) sulfamethyldiazine; (2) sulfamethazine; (3) sulfamethoxypyridazine; and (4) sulfamethoxazole. (a) Diamonsil C18 (5 μm, 4.6 × 250 mm); (b) Self-made chromatographic column (5 μm, 4.6 × 250 mm).

**Table S1.** Chemical structure of reagents used for the preparation of C18@PS-DVB-Fe<sub>3</sub>O<sub>4</sub> particles.

| Number | Reagents             | Chemical Structures |
|--------|----------------------|---------------------|
| 1      | Styrene (ST)         |                     |
| 2      | Oleic acid (OA)      |                     |
| 3      | Divinylbenzene (DVB) |                     |

---

4      2,2'-Azobis(2-methylpropionitrile) (AIBN)

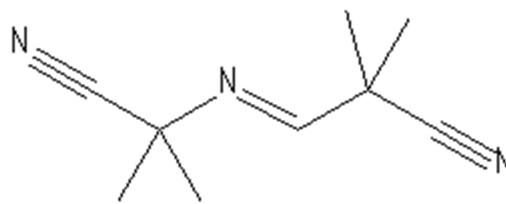

5      Sodium dodecyl sulfate (SDS)

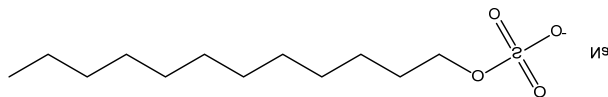

6      Dibutyl phthalate (DBP)

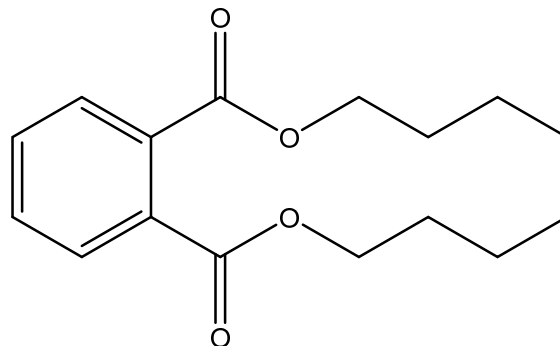

7      Benzoyl peroxide (BPO)

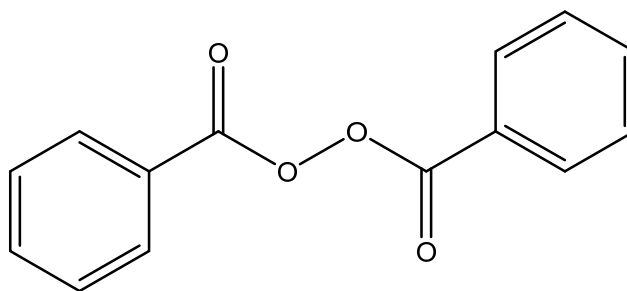

8      N, N-dimethyloctadecylamine

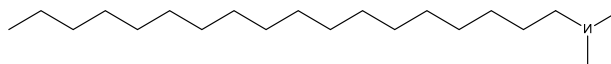

9      Glycidyl methacrylate (GMA)

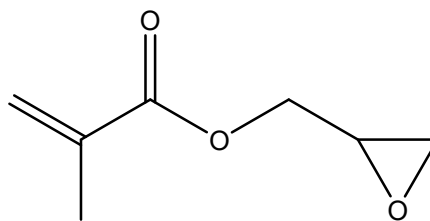

Supplement: s1 [file s1]
